# Supplementary material for: Evaluation of proton transport and solvation effect in hydrated Nafion membrane with degradation
Source: Royal Society of Chemistry journal article supplement (doi:10.1039/d2cp02817d), 2022-01-01
Supplement: d2cp02817d1.pdf [file d2cp02817d1.pdf]

## Supporting Information

Evaluation of proton transport and solvation effect in hydrated Nafion membrane with  
degradation

Yu Hu<sup>a</sup>, Shuai Wang<sup>a,\*</sup>, Yurong He<sup>a</sup>, Liang An<sup>b</sup>

<sup>a</sup> School of Energy Science and Engineering, Harbin Institute of Technology, Harbin, 150001, China

<sup>b</sup> Department of Mechanical Engineering, The Hong Kong Polytechnic University, Hung Hom, Kowloon, Hong Kong SAR, China

\* Corresponding author. Tel.: +0451 8641 2258; fax: +0451 8622 1048.

E-mail address: [shuaiwang@hit.edu.cn](mailto:shuaiwang@hit.edu.cn)

Fig. S1 Snapshots of hydrophilic domains along the X/Y/Z direction in the hydration Nafion membrane at  $\lambda=15$ . (a) (c) (e) without attack (b) (d) (f) with attacked C-S bond (O in water-red, H in water-white)

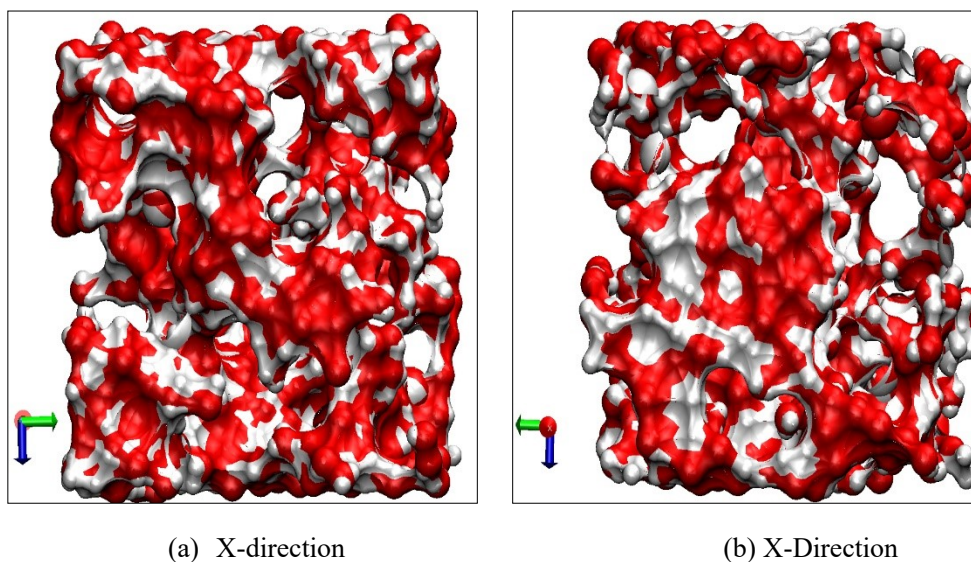

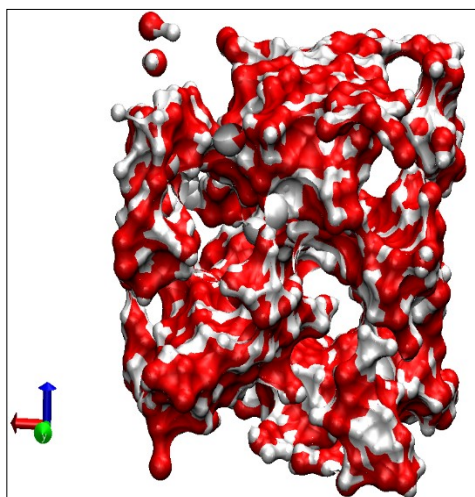

(c) Y-Direction

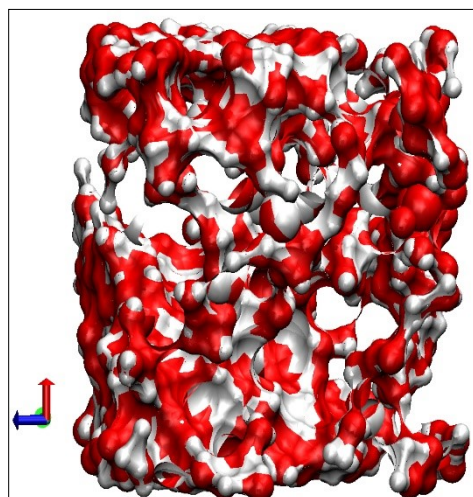

(d) Y-Direction

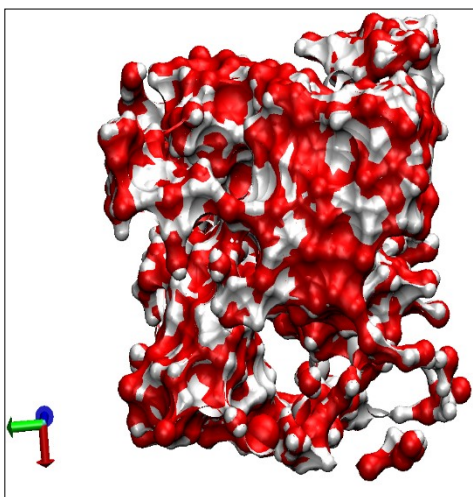

(e) Z-Direction

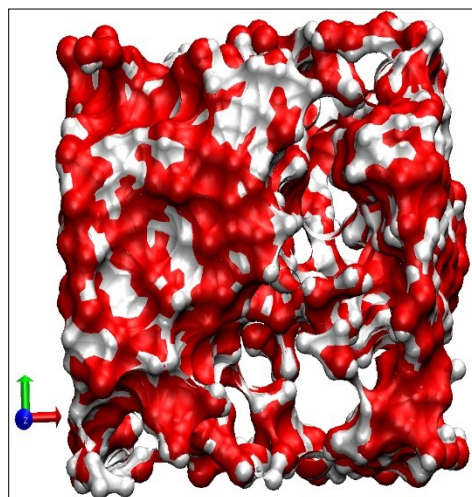

(f) Z-Direction

---

Fig. S2 Snapshots of the largest hydrophilic clusters along the X/Y/Z direction in the hydration Nafion membrane at  $\lambda=15$ . (a) (c) (e) without attack (b) (d) (f) with attacked C-S bond (O in water-red)

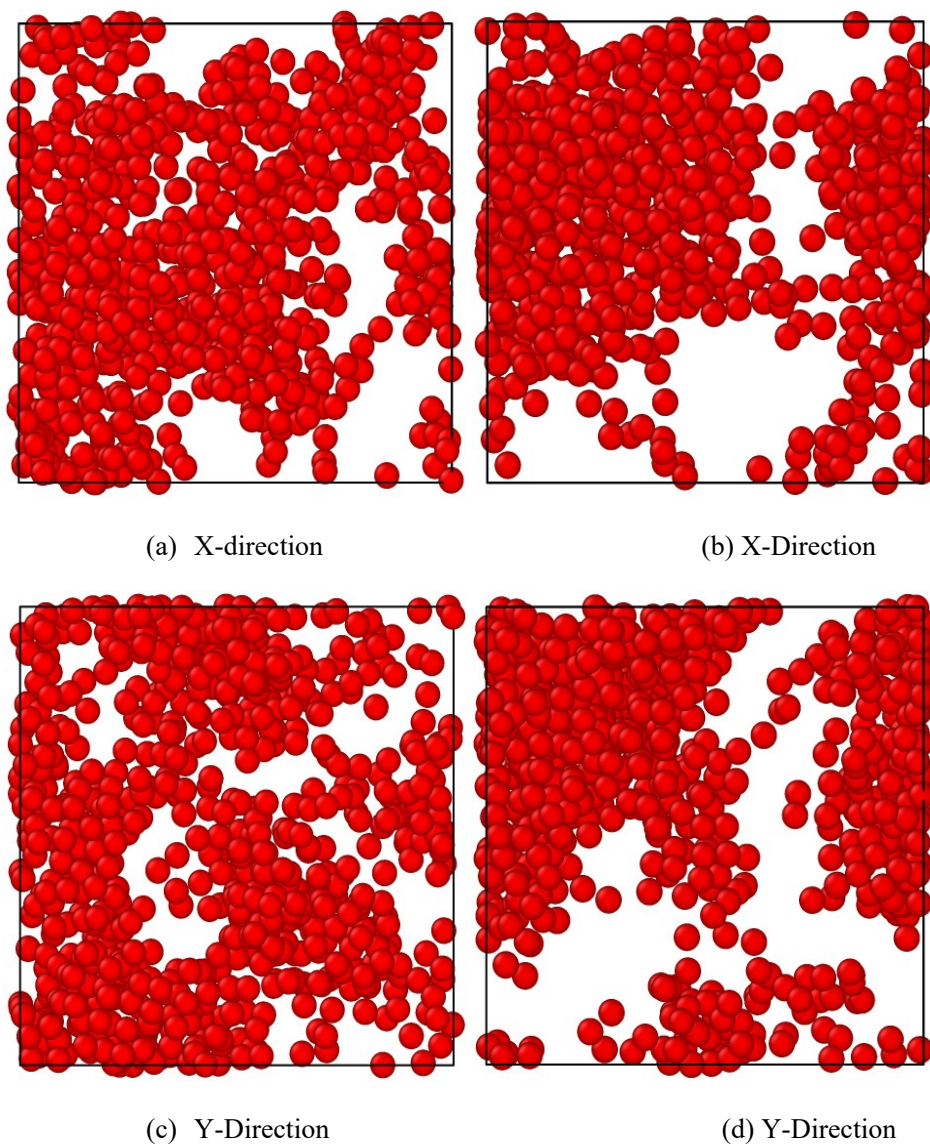



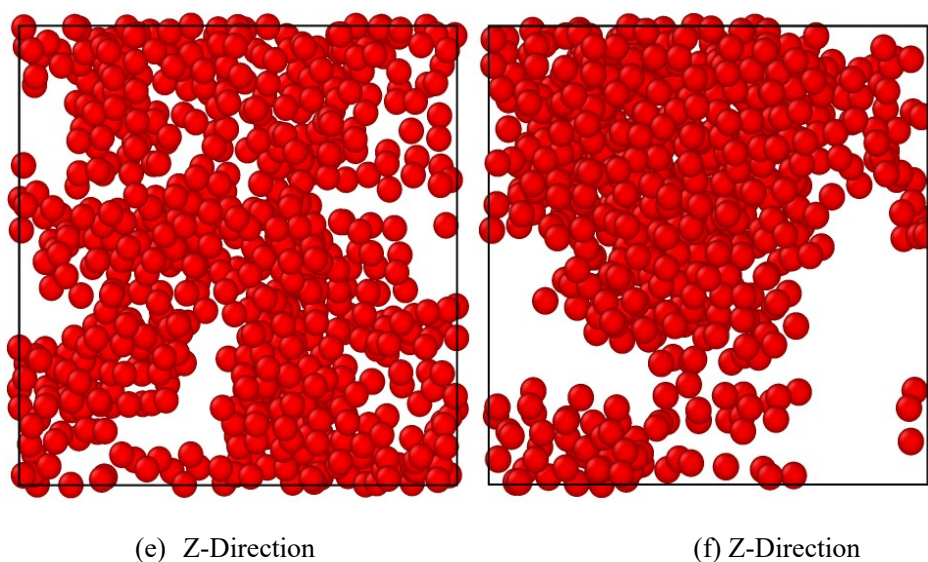

Fig. S3 Snapshots of hydronium ion and sulfonic acid/ carboxylic acid group distribution atoms along the X/Y/Z direction in the hydrated Nafion membrane with  $\lambda = 15$ . (a) (c) (e) without attack, (b) (d) (f) with attacked C-S bond (O atom in water-red, H atom in water-white, O atom in hydronium ion-green and magnified, H atom in hydronium ion-white, S and O atom in sulfonic acid group-yellow and red with magnified, C and O atom in carboxylic acid group-grey and red with magnified)

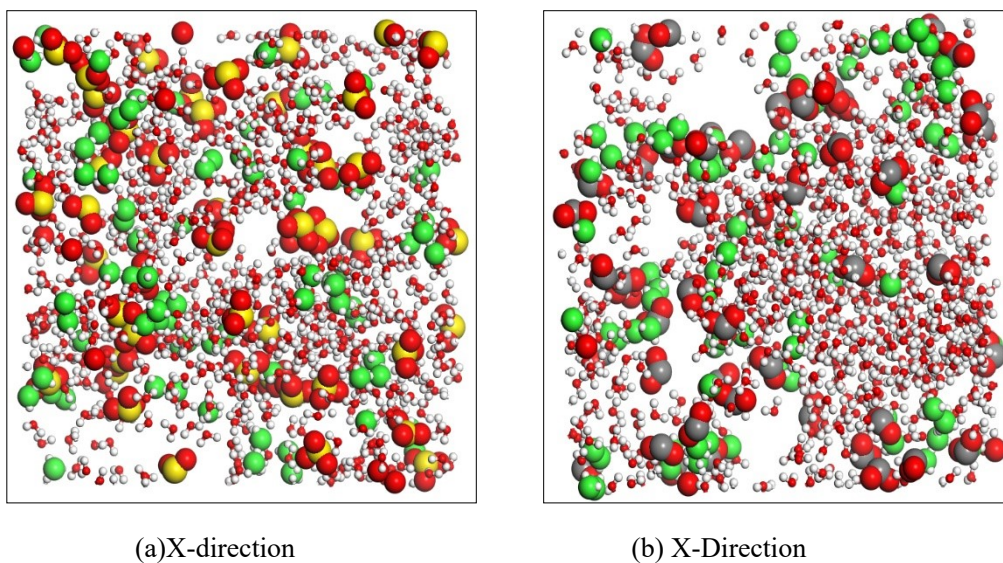

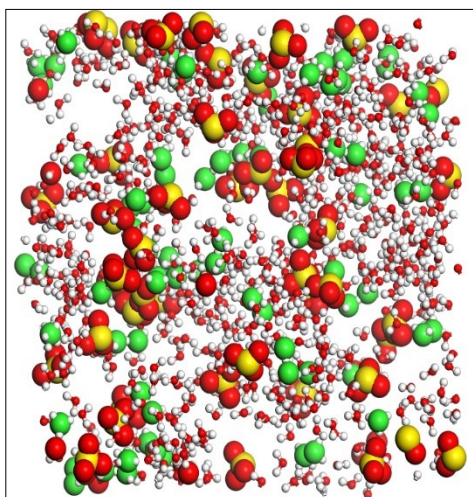

(c) Y-Direction

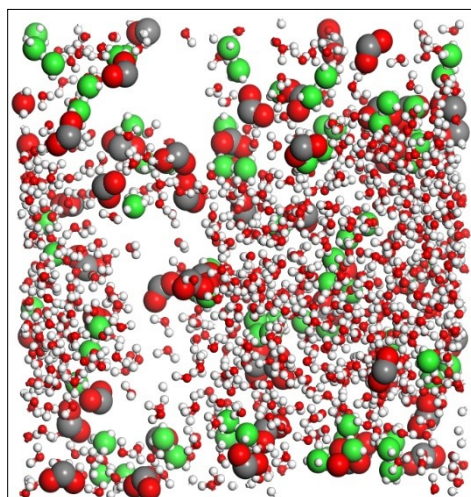

(d) Y-Direction

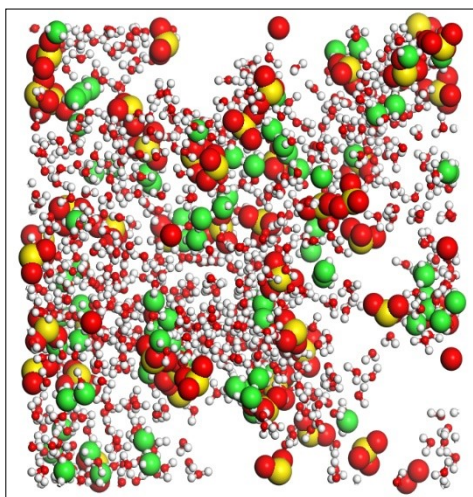

(e) Z-Direction

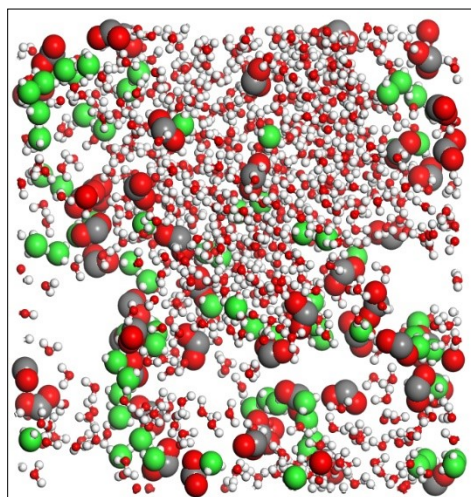

(f) Z-Direction
